# Supplementary material
Source: Elsevier journal article supplement (https://www.sciencedirect.com/science/article/pii/S0300893219304178)
Supplement: mmc1 [file S0300893219304178:mmc1.pdf]

## **Efecto de la ablación con catéter de venas pulmonares en la función renal de pacientes con fibrilación auricular. Estudio de cohortes prospectivo**

### **MATERIAL ADICIONAL**

#### **Ablación con catéter**

Los fármacos antiarrítmicos se suspendieron 5 vidas medias antes del procedimiento. En el caso de los pacientes anticoagulados con antagonistas de la vitamina K, la ablación se llevó a cabo sin suspender la anticoagulación, con una razón internacional normalizada (INR) objetivo < 3,5. En el caso de los anticoagulantes directos se suspendieron 24 h antes del procedimiento. Si el paciente no estaba anticoagulado antes del procedimiento o bien había estado mal anticoagulado se realizaba una ecocardiografía transesofágica el mismo día o el previo para descartar la presencia de trombos en la aurícula izquierda. Se utilizó ablación con radiofrecuencia o crioablación a criterio clínico; en el caso de FA persistente solo se empleó ablación con radiofrecuencia.

Para el procedimiento se utilizó un catéter decapolar colocado en el seno coronario a través de una vena braquial izquierda y un catéter tetrapolar en ápex de ventrículo derecho-His a través de vena femoral. Se realizó punción transeptal guiada con escopia, tras la cual se administró un bolo de heparina sódica de 100 UI/kg y bolos posteriores para mantener un tiempo de coagulación activada > 350 s. Se realizó una angiografía rotacional cuya imagen 3D servía de guía en caso de crioablación o se fusionaba con el sistema de navegación en los casos de ablación con radiofrecuencia (CARTO, Biosense-Webster, Diamond Bar, CA; o NAVx, St. Jude Medical, St. Paul, MN). Para la realización de dicha angiografía rotacional se usó un volumen de contraste yodado (Iomeron) de entre 120 y 180 cc en función del grado de dilatación auricular, la inyección de contraste se realizó bajo apnea y con estimulación ventricular a 260 ms para evitar el paso temprano de contraste al ventrículo. En todos los casos se realizó ablación circunferencial de venas pulmonares, tan solo se realizaron líneas de ablación en los casos de aleteo izquierdo concomitante y ablación de ICT en aquellos pacientes con antecedentes de aleteo común. En los casos de ablación

con radiofrecuencia se usó un catéter irrigado con contacto (Thermocool SmartTouch, Biosense-Webster, Diamond Bar, CA; o TactiCath, St. Jude Medical, St. Paul, MN) y un catéter circular (LASSO, Biosense-Webster, Diamond Bar, CA) para comprobar el aislamiento de las venas pulmonares. En el caso de la crioablación se utilizó la vaina FlexCath, el catéter Artic Front Advance 28 mm de segunda generación y Achieve (Medtronic, Minneapolis, MN, Estados Unidos).

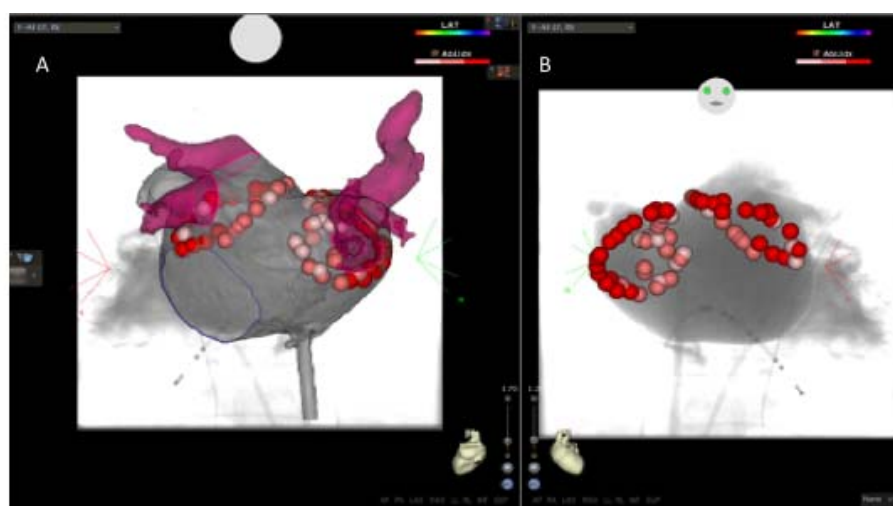

**Imagen 1.** Panel A: reconstrucción tridimensional de la AI a partir de angiografía rotacional (imagen integrada con CARTO Univue®, visión en PA), los puntos rojos representan las aplicaciones de RF, las venas pulmonares se muestran en color rosa. Panel B: angiografía rotacional sin reconstrucción tridimensional con las aplicaciones de RF superpuestas (visión en AP).

AI: aurícula izquierda; AP: anteroposterior; PA: posteroanterior; RF: radiofrecuencia.
